# Supplementary material for: A new supramolecular isomer of [Zn(nicotinate)2]n: a novel 42.84 network that is the result of self-assembly of 4-connected nodesElectronic supplementary information (ESI) available: experimental details, TGA and XRPD of all compounds. See http://www.rsc.org/suppdata/cc/b1/b111280p/
Source: Royal Society of Chemistry journal article supplement (doi:10.1039/b111280p), 2002-03-05
Supplement: b111280p.doc [file b111280p.doc]

SUPPLEMENTARY DATA

**A new supramolecular isomer of [Zn(nicotinate)2]n: a novel 42.84 network that is the result of self-assembly of 4-connected nodes**

Beth Rather, Brian Moulton, Rosa D. Bailey Walsh and Michael J. Zaworotko *

Department of Chemistry, University of South Florida, 4202 E Fowler Ave (SCA 400), Tampa, FL, 33620, USA.

**Materials and Methods**

Each synthesis was conducted using materials as received from chemical sources (Sigma-Aldrich); solvents were purified and dried by distillation. Thermogravimetric analysis was performed under nitrogen on TA Instruments TGA 2950 Hi-Res. XRPD data were recorded on a Rigaku RU15 diffractometer at 30kV, 15mA for CuKα (λ = 1.5418 Å), with a scan speed of 1°/min and a step size of 0.02° in 2θ at room temperature. The simulated XRPD patterns were produced using Materials Studio program package and Powder Cell for Windows Version 2.3.

**Table of contents**

**Figure S1.** Thermogravimetric analysis of (a) **1b**, (b) **1c** and (c) **2**.

**Figure S2.** X-ray powder diffraction pattern calculated from the single crystal structure of **1a**.

**Figure S3.** X-ray powder diffraction patterns of **1b** (a) fresh sample, (b) calculated from the single crystal structure, (c) sample heated to 220ºC and (d) calculated from the single crystal structure without guest.

**Figure S4.** X-ray powder diffraction patterns of **1c** (a) fresh sample, (b) calculated from the single crystal structure, (c) sample heated to 250ºC and (d) calculated from the single crystal structure without guest.

**Figure S5.** X-ray powder diffraction patterns of **2** (a) fresh sample, (b) calculated from the single crystal structure, (c) sample heated to 250ºC and (d) calculated from the single crystal structure without guest.

**Figure S6.** X-ray powder diffraction patterns of the products of the reaction Zn(NO3)2 + Nicotinate in different conditions: (a) first product of the reaction in PhNO2, (b) MeOH only, (c) PhH, (c) PhCl, (d) *o-* and *p-*Ph(CH3), (e) *p-*H2NPhNO2 and (f) PhOCH3.

**
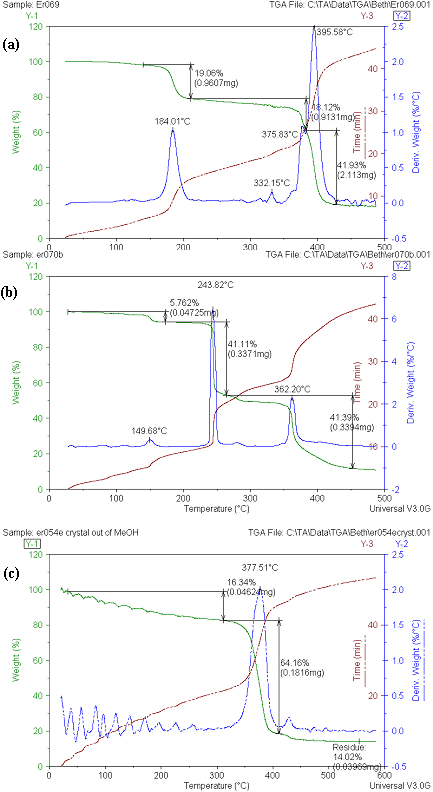
**

**Figure S1.** Thermogravimetric analysis of (a) **1b**, (b) **1c** and (c) **2**.

**
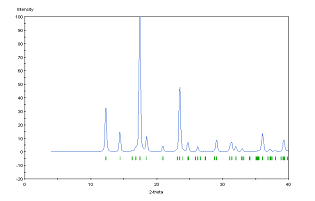
**

**Figure S2.** X-ray powder diffraction pattern calculated from the single crystal structure of **1a**.


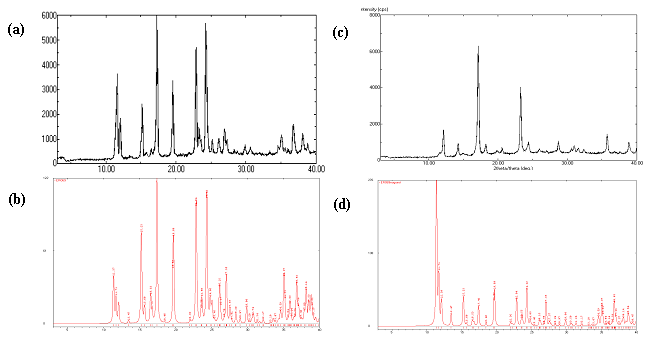


**Figure S3.** X-ray powder diffraction patterns of **1b** (a) fresh sample, (b) calculated from the single crystal structure, (c) sample heated to 220ºC and (d) calculated from the single crystal structure without guest.

**
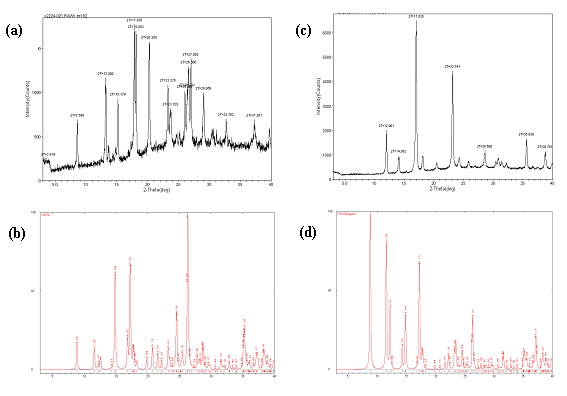
**

**Figure S4.** X-ray powder diffraction patterns of **1c** (a) fresh sample, (b) calculated from the single crystal structure, (c) sample heated to 250ºC and (d) calculated from the single crystal structure without guest.

**
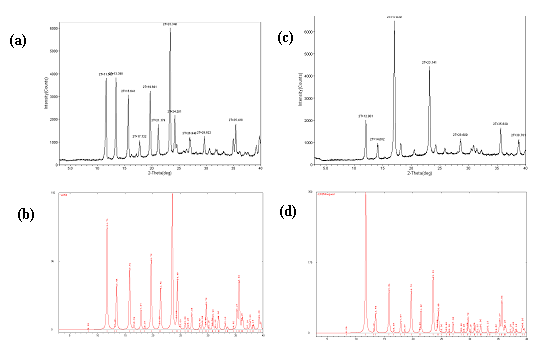
**

**Figure S5.** X-ray powder diffraction patterns of **2** (a) fresh sample, (b) calculated from the single crystal structure, (c) sample heated to 250ºC and (d) calculated from the single crystal structure without guest.

**
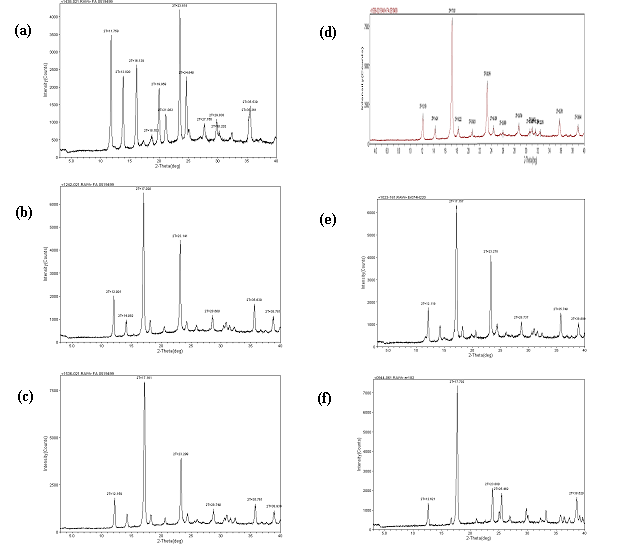
**

**Figure S6.** X-ray powder diffraction patterns of the products of the reaction Zn(NO3)2 + Nicotinate in different conditions: (a) first product of the reaction in PhNO2 (compound **2)**, (b) MeOH only, (c) PhH, (c) PhCl, (d) *o-* and *p-*Ph(CH3), (e) *p-*H2NPhNO2 and (f) PhOCH3.
